# Supplementary material for: Species Distribution Models for Crop Pollination: A Modelling Framework Applied to Great Britain
Source: PubMed Central journal article supplement (PMC3796555; doi:10.1371/journal.pone.0076308), 2013-10-14
Supplement: pone.0076308.s001.pdf [file pone.0076308.s001.pdf]

## FILE S1: INTRODUCTION

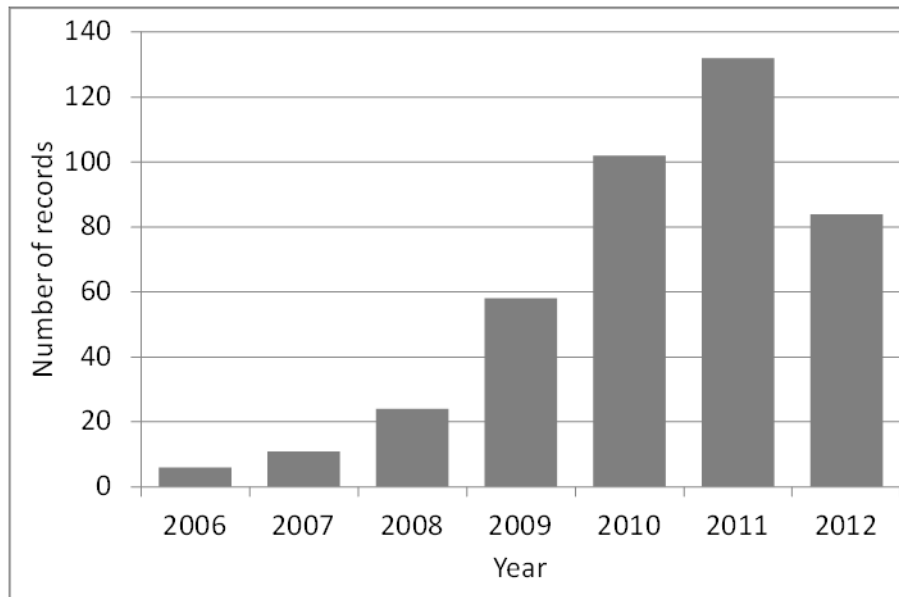

**Figure S1-1: Number of records from Web of Knowledge for applications of MaxEnt in species distribution models.**

Search criteria: Topic = "Maxent" AND "Species distribution"; Years = from 2006 to 2012; access date: 28/08/2012.
