# Supplementary material for: Species Distribution Models for Crop Pollination: A Modelling Framework Applied to Great Britain
Source: PubMed Central journal article supplement (PMC3796555; doi:10.1371/journal.pone.0076308), 2013-10-14
Supplement: pone.0076308.s002.pdf [file pone.0076308.s002.pdf]

## FILE S2: DATASETS

**Table S2-1: Species selected for model calibration.**

Sample size equals to the number of occupied 1 km<sup>2</sup> grid cells, which becomes the area occupied by a species solely based on existing records; quartile distance is the longest distance between all pairwise records for a particular species within its 3<sup>rd</sup> quartile.

| Bees                           |             |                        | Hoverflies                  |             |                        |
|--------------------------------|-------------|------------------------|-----------------------------|-------------|------------------------|
| Species name                   | Sample size | Quartile distance (km) | Species name                | Sample size | Quartile distance (km) |
| <i>Andrena barbilabris</i>     | 228         | 340.4                  | <i>Episyrphus balteatus</i> | 4105        | 268.3                  |
| <i>A. labialis</i>             | 184         | 185.8                  | <i>Eristalis horticola</i>  | 583         | 312.6                  |
| <i>A. labiata</i>              | 183         | 163.2                  | <i>E. tenax</i>             | 2846        | 269.8                  |
| <i>A. minutuloides</i>         | 104         | 97.7                   | <i>Rhingia campestris</i>   | 2196        | 278.2                  |
| <i>A. niveata</i>              | 12          | 63.8                   | <i>R. rostrata</i>          | 233         | 215.4                  |
| <i>Anthophora plumipes</i>     | 447         | 198.3                  | <i>Syrphus ribesii</i>      | 2001        | 257.9                  |
| <i>Bombus muscorum</i>         | 599         | 763.9                  |                             |             |                        |
| <i>B. pascuorum</i>            | 4254        | 506.9                  |                             |             |                        |
| <i>B. terrestris</i>           | 2628        | 301.8                  |                             |             |                        |
| <i>Halictus rubicundus</i>     | 502         | 452.7                  |                             |             |                        |
| <i>Lasioglossum brevicorne</i> | 45          | 139.6                  |                             |             |                        |
| <i>L. fratellum</i>            | 144         | 439.9                  |                             |             |                        |
| <i>L. malachurum</i>           | 536         | 140.0                  |                             |             |                        |
| <i>L. nitidiusculum</i>        | 30          | 382.7                  |                             |             |                        |
| <i>L. rufitarse</i>            | 72          | 435.7                  |                             |             |                        |
| <i>L. semilucens</i>           | 13          | 115.2                  |                             |             |                        |
| <i>L. villosulum</i>           | 617         | 280.2                  |                             |             |                        |
| <i>L. xanthopus</i>            | 66          | 164.2                  |                             |             |                        |
| <i>Megachile centuncularis</i> | 245         | 326.7                  |                             |             |                        |
| <i>M. maritima</i>             | 106         | 299.7                  |                             |             |                        |
| <i>Osmia bicolor</i>           | 186         | 141.4                  |                             |             |                        |
| <i>O. rufa</i>                 | 1104        | 241.3                  |                             |             |                        |

**Table S2-2: Pearson’s correlation between selected topographic and bio-climatic variables.**

To minimize multicollinearity [1] within the original set of bio-climatic and topographic variables (19 and 4 respectively), we applied Jolliffe’s Principal Component Analysis with the rejection method “B2” [2], removing variables associated to components with eigenvalue  $< \lambda_0$  (usually  $0.69 \leq \lambda_0 \leq 0.74$ ). Predictors are defined in the main text.

|            | RainSeasCV | RainCQ | Isoth | TAR   | MTDQ  | MTCQ  | AspEW |
|------------|------------|--------|-------|-------|-------|-------|-------|
| RainSeasCV |            |        |       |       |       |       |       |
| RainCQ     | 0.6        |        |       |       |       |       |       |
| Isoth      | 0.00       | 0.08   |       |       |       |       |       |
| TAR        | -0.34      | -0.60  | 0.37  |       |       |       |       |
| MTDQ       | 0.46       | 0.33   | 0.16  | -0.24 |       |       |       |
| MTCQ       | 0.15       | -0.26  | -0.10 | -0.01 | 0.20  |       |       |
| AspEW      | -0.07      | -0.04  | 0.01  | 0.01  | -0.09 | -0.02 |       |
| AspNS      | -0.03      | -0.07  | -0.01 | 0.09  | -0.03 | -0.03 | -0.02 |

## REFERENCES

1. Guisan A, Thuiller W (2005) Predicting species distribution: offering more than simple habitat models. *Ecol Lett* 8: 993-1009.
2. Jolliffe IT (1973) Discarding Variables in a Principal Component Analysis, II: Real Data. *Applied Statistics* 22: 21-31.
