# Supplementary material for: Species Distribution Models for Crop Pollination: A Modelling Framework Applied to Great Britain
Source: PubMed Central journal article supplement (PMC3796555; doi:10.1371/journal.pone.0076308), 2013-10-14
Supplement: pone.0076308.s003.pdf [file pone.0076308.s003.pdf]

## FILE S3: PREVALENCE

To determine prevalence, the proportion of occupied sites, MaxEnt treats the log of the raw output as logit score: the logit score is used to calibrate the intercept so that the probability of presence at sites with “typical” conditions is the parameter  $\tau$ . Knowing  $\tau$  provides a solution to obtaining prevalence and in absence of other knowledge,  $\tau$  is arbitrarily set to 0.5. The probability of presence, however, is defined over specific spatial and temporal scales [1], which should be taken into account particularly when working with pools of species with different degrees of commonality / rarity. In our study we run part of the models with modified values of  $\tau$ , based on the range of commonality observed within the data.

The information we used to establish new values for  $\tau$  was the following:

- Temporal scale: 11 years: from 2000 to present, with the exclusion of 2011 as only 1 record was present in the database;
- Spatial scale [ $a$ ]: number of occupied cells at the 1 x 1 km grain (=“occupied area”), for each species;
- “Rarity” [ $b$ ]: total number of records at any grain, from 2000 to present, for each species;
- Years with records [ $c$ ]: number of years with non-zero observations, for each species.

Based on these definitions, we derived for each species:

- $d = b/a$ , the average number of records per km<sup>2</sup> (“species’ density”)
- $f = c/11$ , a correction factor for species having 0 (zero) records at any year;
- $\tau_{\text{temp}} = \log(d)*f$ , to weigh the obtained density by the ratio  $f$ ;

The revised  $\tau$  for each species was obtained as:

$$\tau_{\text{rev}} = (\tau_{\text{temp}} * 0.5) / \max(\tau_{\text{temp}})$$

Where 0.5 = default  $\tau$ ;  $\max(\tau_{\text{temp}})$  = maximum value of  $\tau_{\text{temp}}$  observed within the data.

Figure S3-1 shows the number of species for each revised  $\tau$ . Their identity is shown in Table S3-1.

As an example of the effects of modifying prevalence, Figs S3-2.1 and S3-2.2 show some of the species’ response curves in models built with one predictor in turn, with default (0.5) and modified prevalence. For all curves shown in Figs S3-2.1 and S3-2.2, the red line indicates the average response from the 10-fold cross-validation runs, whilst the blue area shows one standard deviation from the mean. Predictors are defined in the main text.

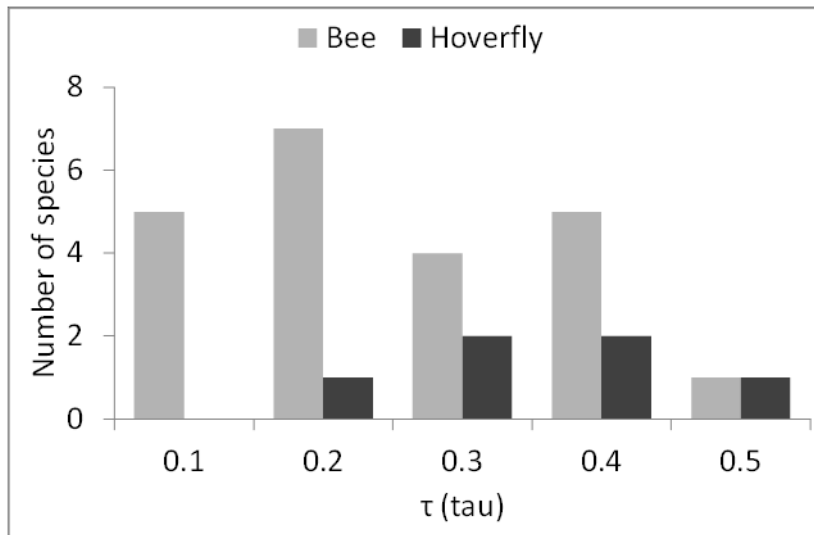

**Figure S3-1: Number of species within each class of modified prevalence ( $\tau$ ), for bees (grey) and hoverflies (black).**

**Table S3-1: Revised values of  $\tau$  for species used during model calibration.**

| $\tau$ | Bees                           | Hoverflies                  |
|--------|--------------------------------|-----------------------------|
| 0.1    | <i>Andrena niveata</i>         | None                        |
|        | <i>Lasioglossum fratellum</i>  |                             |
|        | <i>L. nitidiusculum</i>        |                             |
|        | <i>L. semilucens</i>           |                             |
| 0.2    | <i>L. xanthopus</i>            | <i>Eristalis horticola</i>  |
|        | <i>Lasioglossum brevicorne</i> |                             |
|        | <i>L. malachurum</i>           |                             |
|        | <i>L. rufitarse</i>            |                             |
|        | <i>L. villosulum</i>           |                             |
|        | <i>Megachile centuncularis</i> |                             |
| 0.3    | <i>M. maritima</i>             | <i>Rhingia campestris</i>   |
|        | <i>Osmia rufa</i>              |                             |
|        | <i>Andrena labialis</i>        |                             |
|        | <i>A. labiata</i>              |                             |
| 0.4    | <i>Bombus muscorum</i>         | <i>R. rostrata</i>          |
|        | <i>Halictus rubicundus</i>     |                             |
|        | <i>Andrena minutuloides</i>    |                             |
|        | <i>Anthophora plumipes</i>     |                             |
|        | <i>Bombus pascuorum</i>        |                             |
| 0.5    | <i>B. terrestris</i>           | <i>Eristalis tenax</i>      |
|        | <i>Osmia bicolor</i>           |                             |
|        | <i>Andrena barbilabris</i>     |                             |
|        |                                | <i>Syrphus ribesii</i>      |
|        |                                | <i>Episyrphus balteatus</i> |

Crop pollination from species occurrences: supporting information

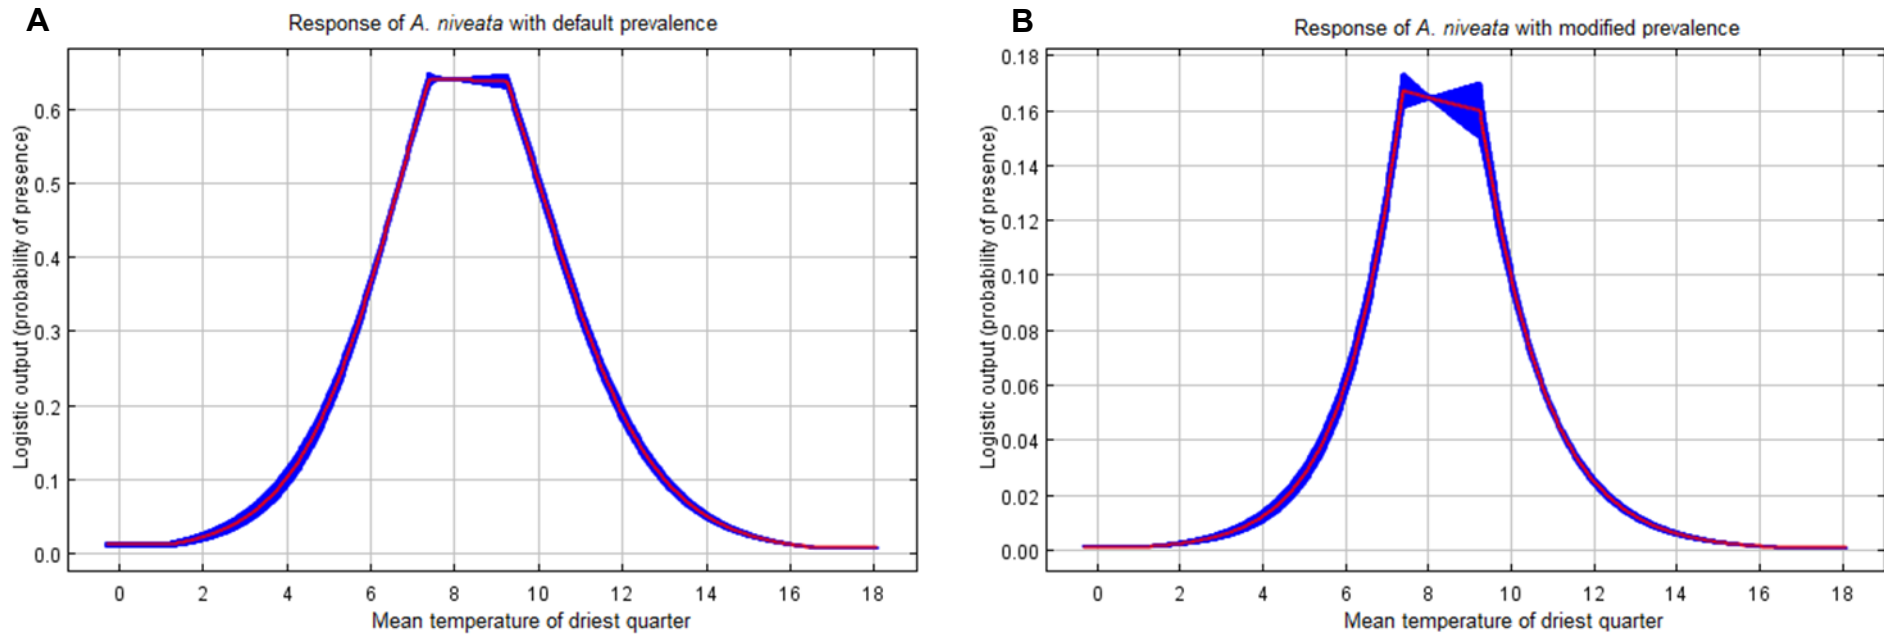

**Figure S3-2.1: Single response curves for *Andrena niveata* with default and modified prevalence.**

Response of *A. niveata* to mean temperature of the driest quarter, with default (0.5, panel A) and modified prevalence (0.1, panel B). Modifying the prevalence changes the maximum probability of presence from  $\sim 0.65$  to  $\sim 0.17$ . The response curves are based on a (MaxEnt) model created using only the focal predictor. The curves show the mean response of the 10 runs (red) and the mean  $\pm$  one standard deviation (blue).

## Crop pollination from species occurrences: supporting information

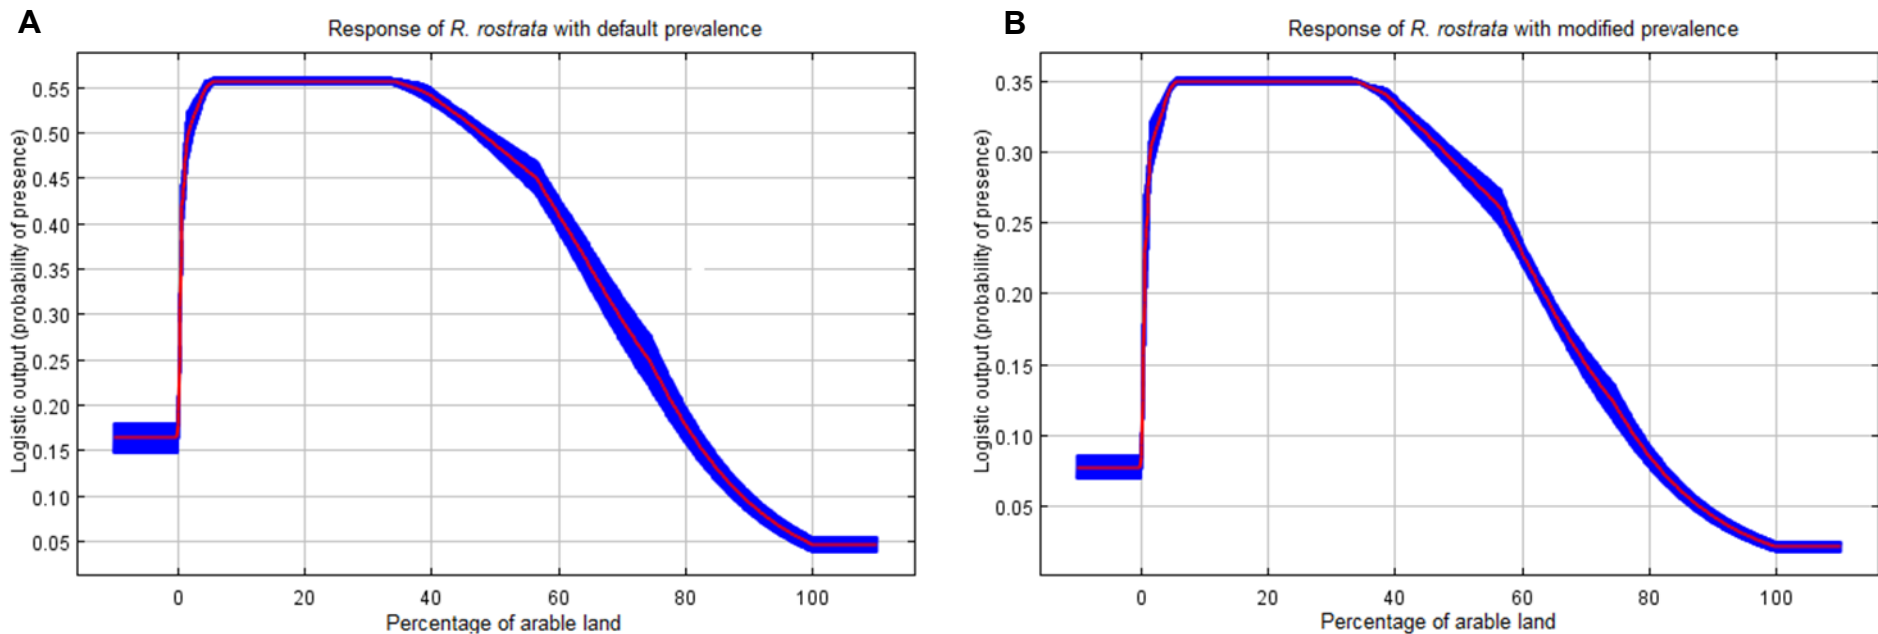

**Figure S3-2.2: Single response curves for *Rhingia rostrata* with default and modified prevalence.**

Response of *R. rostrata* to percentage of arable land, with default (0.5, panel A) and modified (0.3, panel B) prevalence. The maximum predicted probability of presence changes from  $\sim 0.55$  to  $\sim 0.35$ . The response curves are based on a (MaxEnt) model created using only the focal predictor. The curves show the mean response of the 10 runs (red) and the mean  $\pm$  one standard deviation (blue).

## REFERENCES

1. Elith J, Phillips SJ, Hastie T, Dudík M, Chee YE, et al. (2011) A statistical explanation of MaxEnt for ecologists. *Divers Distrib* 17: 43-57.
