# Supplementary material for: Species Distribution Models for Crop Pollination: A Modelling Framework Applied to Great Britain
Source: PubMed Central journal article supplement (PMC3796555; doi:10.1371/journal.pone.0076308), 2013-10-14
Supplement: pone.0076308.s007.pdf [file pone.0076308.s007.pdf]

FILE S7: MANAGED HONEY BEES' DISTRIBUTION

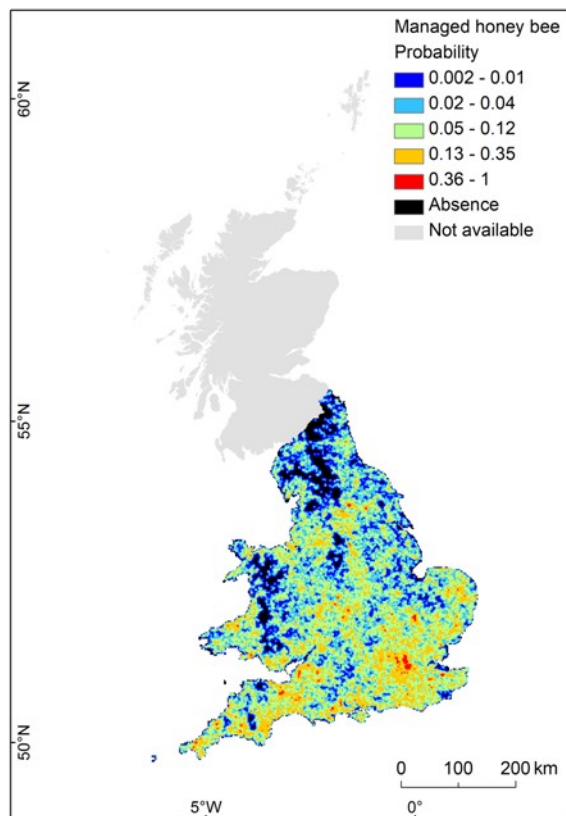

**Figure S7-1: Probability of occurrence of managed honey bees.**

The original density of foragers was linearly rescaled to 0-1 and the 5<sup>th</sup> percentile threshold was adopted to distinguish absence from presence (corresponding to a 0.001 probability of occurrence). Map projection: British National Grid.
